# Supplementary material for: Eighteenth century Yersinia pestis genomes reveal the long-term persistence of an historical plague focus
Source: eLife. 2016 Jan 21;5:e12994. doi: 10.7554/eLife.12994 (PMC4798955; doi:10.7554/eLife.12994)
Supplement: Supplementary file 1. — DOI: http://dx.doi.org/10.7554/eLife.12994.008 [file elife-12994-supp1.xls]

## Sheet: SNPs not unique to Observance
Table S1a - SNPs not unique to Observance
Position	Ref	OBS107	OBS110	OBS116	OBS124	OBS137	Agreement (^) or Disagreement (x)
74539	C	T	T	T	T	T	^
130643	G	A	A	A	A	A	^
286528	T	A	A	A	A	A	^
325836	T	C	C	C	C	C	^
545488	T	C	C	C	C	C	^
699494	A	G	G	G	G	G	^
699647	T	N	C	C	C	C	^
877258	T	C	C	C	N	C	^
1017647	T	C	C	C	C	C	^
1025278	T	G	G	G	G	G	^
1178178	T	C	C	C	C	C	^
1178459	T	C	C	C	C	C	^
1272559	T	C	C	C	C	C	^
1306718	T	C	C	C	C	C	^
1385780	T	C	C	C	C	C	^
1512930	A	G	G	G	G	G	^
1735263	A	C	C	C	C	C	^
1749443	T	C	C	C	C	C	^
1808946	T	C	C	C	C	C	^
2022335	A	C	C	C	C	C	^
2098628	T	C	C	C	C	C	^
2262577	T	G	G	G	G	G	^
2277583	G	A	A	A	N	A	^
2278317	A	G	G	G	G	G	^
2300659	T	G	G	G	G	G	^
2356003	T	A	A	A	N	A	^
2453454	A	G	G	G	G	G	^
2508389	T	C	C	C	C	C	^
2575152	G	A	A	A	A	A	^
2684793	A	G	G	G	G	G	^
2739149	C	N	A	A	A	A	^
2744933	A	N	N	G	G	G	^
2903882	T	G	G	G	G	G	^
2934972	C	G	G	G	G	G	^
2936268	G	N	A	A	A	A	^
2950954	G	A	A	A	A	A	^
2958327	C	T	T	T	N	T	^
2968425	A	G	G	G	N	G	^
3085079	A	G	G	G	G	G	^
3145523	A	C	C	C	C	C	^
3190399	A	G	G	G	G	G	^
3244204	A	G	G	G	G	G	^
3267118	A	G	G	G	N	G	^
3324959	A	G	N	G	G	G	^
3362591	A	G	G	G	G	G	^
3397040	A	G	G	G	G	G	^
3421335	A	G	N	N	N	G	^
3442617	A	N	T	T	T	T	^
3564026	C	T	T	T	T	T	^
3616733	A	G	G	G	N	G	^
3645151	C	G	G	G	G	G	^
3667806	A	G	G	G	G	G	^
3732919	A	G	G	G	G	G	^
3806677	C	T	T	T	T	T	^
3973746	C	T	T	T	T	T	^
4082562	T	C	C	C	C	C	^
4083536	A	G	G	G	G	G	^
4173149	A	C	C	C	N	C	^
4194600	G	A	A	A	A	A	^
4243823	A	T	T	T	T	T	^
4371886	A	G	G	G	N	G	^
4421633	T	N	C	C	C	C	^
4421689	A	N	G	G	G	G	^
4425410	A	G	G	G	N	G	^
4518401	G	A	A	A	A	A	^
4579183	A	G	G	G	G	G	^
4634287	A	G	G	G	G	G	^

## Sheet: SNPs unique to Observance
Table S1b - SNPs unique to Observance
Position	Ref	OBS107	OBS110	OBS116	OBS124	OBS137
29368	G	T	T	T	T	T
100383	C	T	T	T	T	T
169412	C	T	T	T	T	T
173032	C	T	T	T	T	T
186060	C	T	T	T	T	T
200723	C	T	T	T	T	T
217009	G	T	T	T	T	T
225436	T	N	A	A	A	A
226722	C	T	T	T	T	T
400143	G	A	A	A	A	A
477107	C	T	T	T	T	T
480773	C	T	T	T	T	T
482327	G	T	T	T	N	T
862385	T	G	G	G	G	G
867712	C	A	A	A	A	A
868549	G	C	C	C	C	C
869820	A	G	G	G	G	G
899158	C	T	T	T	T	T
951295	C	T	T	T	T	T
961795	C	T	N	T	T	T
965281	C	A	A	A	A	A
1159539	T	A	A	A	A	A
1168951	G	T	T	T	T	T
1189479	C	T	T	T	T	T
1232222	C	T	T	T	T	T
1254157	C	N	T	T	T	T
1308719	G	N	N	A	N	A
1378105	G	T	T	T	N	T
1440851	G	T	T	T	T	T
1451124	T	N	G	G	N	G
1458573	T	A	A	A	A	A
1549630	A	N	N	N	G	G
1586982	C	A	A	A	A	A
1614945	T	G	G	G	G	G
1644408	C	A	A	A	A	A
1708192	C	A	A	A	A	A
1713927	C	A	A	A	N	A
1724647	C	T	T	T	N	T
1935112	C	A	A	A	A	A
1952848	G	A	N	A	A	A
2071670	G	T	T	T	T	T
2076353	C	T	T	T	T	T
2105332	C	T	T	T	N	T
2105376	A	N	G	G	G	G
2264654	C	A	A	A	A	A
2281061	C	N	A	N	N	A
2292030	C	T	T	T	T	T
2414599	T	C	C	C	C	C
2472383	A	G	G	G	G	G
2507983	T	G	G	G	G	G
2519931	C	T	T	T	T	T
2596736	A	G	G	G	G	G
2671194	G	A	A	A	N	A
2727385	A	G	G	G	G	G
2877295	G	A	A	A	A	A
2918297	T	G	G	G	G	G
2964936	A	G	G	G	G	G
2973013	C	T	T	T	T	T
3030042	G	T	T	T	T	T
3098104	C	N	A	A	A	A
3229407	T	C	C	C	C	C
3254908	G	A	A	A	A	A
3269577	G	N	T	T	N	T
3407572	A	T	T	T	T	T
3540139	G	A	A	A	A	A
3610371	C	T	T	T	T	T
3613964	C	A	A	A	A	A
3620114	G	A	A	A	A	A
3620500	G	A	A	A	A	A
3764396	C	A	N	A	N	A
3782640	G	A	A	A	A	A
3824821	G	N	A	A	N	A
3872698	C	T	N	T	T	T
3888808	C	.	.	T	.	.
3944305	C	A	A	A	A	A
3973901	G	A	A	A	A	A
3988141	C	T	T	T	T	T
4134121	A	N	T	T	T	T
4150574	C	A	A	A	A	A
4190286	C	A	A	A	N	A
4200639	C	A	A	A	A	A
4208536	A	G	G	G	G	G
4242260	G	T	T	T	T	T
4363505	C	N	T	T	T	T
4396236	G	T	T	T	T	T
4456212	C	A	A	A	A	A
4616904	T	C	C	C	C	C
4642828	G	A	A	A	N	A

## Sheet: Annotation for unique SNPs
Table S1c - Annotation for SNPs unique to Observance
Position	Ref	SNP	OBS107	OBS110	OBS116	OBS124	OBS137	SNP Effect	Gene ID	Gene name	Gene function	old_AA/new_AA	Old_codon/New_codon	Codon_Num(CDS)	CDS_size
29368	G	T	T	T	T	T	T	SYNONYMOUS_CODING	YPO0021	hemN	coproporphyrinogen III oxidase	V/V	gtG/gtT	129	1374
100383	C	T	T	T	T	T	T	NON_SYNONYMOUS_CODING	YPO0090	glpK'	pseudo	E/K	Gaa/Aaa	325	1092
169412	C	T	T	T	T	T	T	INTERGENIC
173032	C	T	T	T	T	T	T	SYNONYMOUS_CODING	YPO0158	cysG	siroheme synthase	K/K	aaG/aaA	178	1413
186060	C	T	T	T	T	T	T	INTERGENIC
186060	C	T	T	T	T	T	T	UPSTREAM: 71 bases	YPO0167	ppiA	peptidyl-prolyl cis-trans isomerase A				570
200723	C	T	T	T	T	T	T	NON_SYNONYMOUS_CODING	YPO0182	tauA	taurine transporter substrate binding subunit	T/M	aCg/aTg	135	1062
217009	G	T	T	T	T	T	T	SYNONYMOUS_CODING	YPO0202	fusA	elongation factor G	L/L	ctG/ctT	243	2109
225436	T	A	N	A	A	A	A	NON_SYNONYMOUS_CODING	YPO0216	rpsC	30S ribosomal protein S3	F/Y	tTc/tAc	130	699
226722	C	T	T	T	T	T	T	INTERGENIC
226722	C	T	T	T	T	T	T	UPSTREAM: 73 bases	YPO0220	rplN	50S ribosomal protein L14				372
400143	G	A	A	A	A	A	A	NON_SYNONYMOUS_CODING	YPO0383	aidB	isovaleryl CoA dehydrogenase	G/R	Ggg/Agg	466	1644
477107	C	T	T	T	T	T	T	SYNONYMOUS_CODING	YPO0452	slt	lytic murein transglycosylase	L/L	Ctg/Ttg	364	1920
480773	C	T	T	T	T	T	T	INTERGENIC
480773	C	T	T	T	T	T	T	UPSTREAM: 65 bases	YPO0456	rob	right origin-binding protein				867
482327	G	T	T	T	T	N	T	INTERGENIC
482327	G	T	T	T	T	N	T	UPSTREAM: 36 bases	YPO0458	arcA	two-component response regulator				717
862385	T	G	G	G	G	G	G	NON_SYNONYMOUS_CODING	YPO0785	ptsP	fused phosphoenolpyruvate-protein phosphotransferase PtsP/GAF domain-containing protein	I/L	Atc/Ctc	435	2247
867712	C	A	A	A	A	A	A	NON_SYNONYMOUS_CODING	YPO0790a	YPO0790a	hypothetical protein	T/N	aCt/aAt	7	234
868549	G	C	C	C	C	C	C	NON_SYNONYMOUS_CODING	YPO0792	ygeD	lysophospholipid transporter LplT	C/W	tgC/tgG	209	1221
869820	A	G	G	G	G	G	G	SYNONYMOUS_CODING	YPO0793	aas	acyl-ACP synthetase	F/F	ttT/ttC	503	2157
899158	C	T	T	T	T	T	T	INTERGENIC
951295	C	T	T	T	T	T	T	SYNONYMOUS_CODING	YPO0863	YPO0863	hypothetical protein	L/L	Ctg/Ttg	182	858
961795	C	T	T	N	T	T	T	SYNONYMOUS_CODING	YPO0874	YPO0874	hypothetical protein	K/K	aaG/aaA	272	1143
965281	C	A	A	A	A	A	A	NON_SYNONYMOUS_CODING	YPO0880	YPO0880	primase	S/Y	tCt/tAt	95	2292
1159539	T	A	A	A	A	A	A	SYNONYMOUS_CODING	YPO1020	recB	exonuclease V subunit beta	P/P	ccT/ccA	1181	3663
1168951	G	T	T	T	T	T	T	NON_SYNONYMOUS_CODING	YPO1028	YPO1028	cysteine sulfinate desulfinase	R/S	Cgt/Agt	143	1320
1189479	C	T	T	T	T	T	T	NON_SYNONYMOUS_CODING	YPO1048	dxr	1-deoxy-D-xylulose 5-phosphate reductoisomerase	P/S	Cca/Tca	189	1197
1232222	C	T	T	T	T	T	T	NON_SYNONYMOUS_CODING	YPO1084	YPO1084	pseudo	A/V	gCg/gTg	53	219
1254157	C	T	N	T	T	T	T	DOWNSTREAM: 39 bases	YPO1110	sdhD	succinate dehydrogenase cytochrome b556 small membrane subunit				348
1254157	C	T	N	T	T	T	T	SYNONYMOUS_CODING	YPO1111	sdhA	succinate dehydrogenase flavoprotein subunit	V/V	gtC/gtT	13	1767
1308719	G	A	N	N	A	N	A	STOP_GAINED	YPO1162	moaE	molybdopterin guanine dinucleotide biosynthesis protein MoaE	W/*	tGg/tAg	22	456
1308719	G	A	N	N	A	N	A	DOWNSTREAM: 64 bases	YPO1161	moaD	molybdopterin synthase small subunit				246
1378105	G	T	T	T	T	N	T	NON_SYNONYMOUS_CODING	YPO1219	YPO1219	pseudo	H/N	Cat/Aat	593	2693
1440851	G	T	T	T	T	T	T	INTERGENIC
1451124	T	G	N	G	G	N	G	NON_SYNONYMOUS_CODING	YPO1291	YPO1291	carbohydrate kinase	V/G	gTg/gGg	394	1554
1458573	T	A	A	A	A	A	A	NON_SYNONYMOUS_CODING	YPO1299	fruK	1-phosphofructokinase	F/L	ttT/ttA	150	939
1549630	A	G	N	N	N	G	G	NON_SYNONYMOUS_CODING	YPO1376	ftsK	cell division protein	K/R	aAa/aGa	1087	3918
1586982	C	A	A	A	A	A	A	NON_SYNONYMOUS_CODING	YPO1403	mukF	condesin subunit F	S/Y	tCc/tAc	163	1323
1614945	T	G	G	G	G	G	G	NON_SYNONYMOUS_CODING	YPO1420	pqiA	paraquat-inducible protein A	L/R	cTa/cGa	73	1287
1644408	C	A	A	A	A	A	A	NON_SYNONYMOUS_CODING	YPO1451	YPO1451	oxidoreductase	D/Y	Gat/Tat	360	2418
1708192	C	A	A	A	A	A	A	NON_SYNONYMOUS_CODING	YPO1504	YPO1504	hypothetical protein	P/Q	cCa/cAa	285	1152
1713927	C	A	A	A	A	N	A	SYNONYMOUS_CODING	YPO1508	mglA	galactose/methyl galaxtoside transporter ATP-binding protein	I/I	atC/atA	462	1521
1724647	C	T	T	T	T	N	T	SYNONYMOUS_CODING	YPO1517	YPO1517	sugar ABC transporter	S/S	tcG/tcA	130	1092
1935112	C	A	A	A	A	A	A	NON_SYNONYMOUS_CODING	YPO1696	YPO1696	outer membrane usher protein	Q/H	caG/caT	208	2448
1952848	G	A	A	N	A	A	A	SYNONYMOUS_CODING	YPO1710	htrE	fimbrial protein	R/R	cgG/cgA	107	1164
2071670	G	T	T	T	T	T	T	STOP_GAINED	YPO1826	fliJ	flagellar biosynthesis chaperone	S/*	tCa/tAa	142	447
2071670	G	T	T	T	T	T	T	UPSTREAM: 19 bases	YPO1825	fliK	flagellar hook-length control protein FliK				1353
2076353	C	T	T	T	T	T	T	SYNONYMOUS_CODING	YPO1830	fliF	flagellar MS-ring protein	T/T	acG/acA	223	1713
2105332	C	T	T	T	T	N	T	INTERGENIC
2105332	C	T	T	T	T	N	T	UPSTREAM: 94 bases	YPO1858	YPO1858	N-acetylneuraminic acid mutarotase				1179
2105376	A	G	N	G	G	G	G	INTERGENIC
2105376	A	G	N	G	G	G	G	UPSTREAM: 50 bases	YPO1858	YPO1858	N-acetylneuraminic acid mutarotase				1179
2264654	C	A	A	A	A	A	A	NON_SYNONYMOUS_CODING	YPO1992	YPO1992	hypothetical protein	M/I	atG/atT	171	660
2281061	C	A	N	A	N	N	A	NON_SYNONYMOUS_CODING	YPO2009	YPO2009	integrase core domain-containing protein	R/L	cGg/cTg	151	510
2292030	C	T	T	T	T	T	T	NON_SYNONYMOUS_CODING	YPO2020	YPO2020	transcriptional regulator	P/L	cCg/cTg	141	810
2414599	T	C	C	C	C	C	C	NON_SYNONYMOUS_CODING	YPO2145	YPO2145	SpoVR family protein	K/E	Aaa/Gaa	85	1536
2472383	A	G	G	G	G	G	G	NON_SYNONYMOUS_CODING	YPO2196	ispZ	intracellular septation protein A	F/S	tTc/tCc	85	543
2507983	T	G	G	G	G	G	G	NON_SYNONYMOUS_CODING	YPO2233	YPO2233	hypothetical protein	T/P	Acc/Ccc	72	306
2519931	C	T	T	T	T	T	T	SYNONYMOUS_CODING	YPO2243	YPO2243	AraC family transcriptional regulator	S/S	agC/agT	219	894
2596736	A	G	G	G	G	G	G	NON_SYNONYMOUS_CODING	YPO2309	rstB	sensor protein RstB	D/G	gAc/gGc	171	1278
2671194	G	A	A	A	A	N	A	INTERGENIC
2671194	G	A	A	A	A	N	A	UPSTREAM: 10 bases	YPO2378	YPO2378	TetR family transcriptional regulator				600
2727385	A	G	G	G	G	G	G	NON_SYNONYMOUS_CODING	YPO2426	YPO2426	hypothetical protein	S/P	Tct/Cct	20	459
2877295	G	A	A	A	A	A	A	NON_SYNONYMOUS_CODING	YPO2562	YPO2562	phosphatase	S/L	tCa/tTa	199	657
2918297	T	G	G	G	G	G	G	INTERGENIC
2964936	A	G	G	G	G	G	G	INTERGENIC
2964936	A	G	G	G	G	G	G	UPSTREAM: 11 bases	YPO2635	fldA	flavodoxin FldA				528
2973013	C	T	T	T	T	T	T	NON_SYNONYMOUS_CODING	YPO2646	proW	glycine betaine transporter membrane protein	G/D	gGc/gAc	331	1167
3030042	G	T	T	T	T	T	T	SYNONYMOUS_CODING	YPO2702	YPO2702	hypothetical protein	T/T	acG/acT	99	1020
3098104	C	A	N	A	A	A	A	NON_SYNONYMOUS_CODING	YPO2763	pdxB	D-isomer specific 2-hydroxyacid dehydrogenase	R/S	Cgc/Agc	321	1128
3229407	T	C	C	C	C	C	C	NON_SYNONYMOUS_CODING	YPO2887	yapB	pseudo	V/A	gTt/gCt	374	3510
3254908	G	A	A	A	A	A	A	SYNONYMOUS_CODING	YPO2912	nadE	NAD synthetase	V/V	gtC/gtT	219	1623
3269577	G	T	N	T	T	N	T	NON_SYNONYMOUS_CODING	YPO2923	YPO2923	tRNA-specific adenosine deaminase	S/R	agC/agA	37	603
3407572	A	T	T	T	T	T	T	NON_SYNONYMOUS_CODING	YPO3049	YPO3049	binding protein-dependent transporter inner membrane protein	L/Q	cTg/cAg	216	1770
3540139	G	A	A	A	A	A	A	SYNONYMOUS_CODING	YPO3177	dxs	1-deoxy-D-xylulose-5-phosphate synthase	V/V	gtG/gtA	117	1860
3610371	C	T	T	T	T	T	T	NON_SYNONYMOUS_CODING	YPO3244	fadE	acyl-CoA dehydrogenase	A/V	gCc/gTc	292	2448
3613964	C	A	A	A	A	A	A	NON_SYNONYMOUS_CODING	YPO3246	hmwC	accessory processing protein	D/Y	Gat/Tat	252	1854
3620114	G	A	A	A	A	A	A	NON_SYNONYMOUS_CODING	YPO3247	hmwA	adhesin	A/V	gCg/gTg	164	5733
3620500	G	A	A	A	A	A	A	SYNONYMOUS_CODING	YPO3247	hmwA	adhesin	G/G	ggC/ggT	35	5733
3764396	C	A	A	N	A	N	A	INTERGENIC
3764396	C	A	A	N	A	N	A	DOWNSTREAM: 43 bases	YPO3376	eno	phosphopyruvate hydratase				1296
3782640	G	A	A	A	A	A	A	NON_SYNONYMOUS_CODING	YPO3389	hemL	glutamate-1-semialdehyde aminotransferase	G/D	gGc/gAc	31	1281
3824821	G	A	N	A	A	N	A	NON_SYNONYMOUS_CODING	YPO3421	aroP	aromatic amino acid transport protein	R/Q	cGg/cAg	12	1398
3872698	C	T	T	N	T	T	T	SYNONYMOUS_CODING	YPO3466	YPO3466	hypothetical protein	G/G	ggG/ggA	71	639
3888808	C	T	.	.	T	.	.	SYNONYMOUS_CODING	YPO3482	YPO3482	multidrug efflux protein	A/A	gcG/gcA	854	3126
3944305	C	A	A	A	A	A	A	SYNONYMOUS_CODING	YPO3531	YPO3531	iron-sulfur cluster repair di-iron protein	I/I	atC/atA	81	666
3973901	G	A	A	A	A	A	A	NON_SYNONYMOUS_CODING	YPO3559	YPO3559	hypothetical protein	D/N	Gac/Aac	145	486
3988141	C	T	T	T	T	T	T	SYNONYMOUS_CODING	YPO3576	yrbG	calcium/sodium:proton antiporter	L/L	Ctg/Ttg	149	975
4134121	A	T	N	T	T	T	T	INTERGENIC
4150574	C	A	A	A	A	A	A	NON_SYNONYMOUS_CODING	YPO3715	malF	maltose transporter membrane protein	N/K	aaC/aaA	451	1578
4190286	C	A	A	A	A	N	A	INTERGENIC
4190286	C	A	A	A	A	N	A	UPSTREAM: 63 bases	YPO3738	YPO3738	hypothetical protein				261
4190286	C	A	A	A	A	N	A	DOWNSTREAM: 60 bases	YPO3737	rsd	anti-RNA polymerase sigma 70 factor				510
4200639	C	A	A	A	A	A	A	SYNONYMOUS_CODING	YPO3746	rpoC	DNA-directed RNA polymerase subunit beta'	L/L	ctG/ctT	282	4221
4208536	A	G	G	G	G	G	G	INTERGENIC
4208536	A	G	G	G	G	G	G	DOWNSTREAM: 72 bases	YPO3752	nusG	transcription antitermination protein NusG				546
4242260	G	T	T	T	T	T	T	NON_SYNONYMOUS_CODING	YPO3779	ubiB	ubiquinone biosynthesis protein UbiB	P/H	cCt/cAt	181	1632
4363505	C	T	N	T	T	T	T	NON_SYNONYMOUS_CODING	YPO3888	ilvC	ketol-acid reductoisomerase	V/I	Gtt/Att	118	1479
4396236	G	T	T	T	T	T	T	NON_SYNONYMOUS_CODING	YPO3914	sthA	soluble pyridine nucleotide transhydrogenase	D/Y	Gat/Tat	116	1401
4456212	C	A	A	A	A	A	A	INTERGENIC
4456212	C	A	A	A	A	A	A	DOWNSTREAM: 23 bases	YPO3959	YPO3959	PfkB family carbohydrate kinase				1008
4616904	T	C	C	C	C	C	C	NON_SYNONYMOUS_CODING	YPO4095	recF	recombination protein F	S/G	Agt/Ggt	54	1086
4642828	G	A	A	A	A	N	A	INTERGENIC

## Sheet: non-core SNPs
Table S1d - SNPs not in core regions (not considered in phylogenetic analysis)
Position	Ref	OBS107	OBS110	OBS116	OBS124	OBS137
442439	T	C	C	C	C	C
581519	G	A	A	A	A	A
616870	T	C	C	C	N	C
753022	T	A	A	A	A	A
773110	T	C	C	C	C	C
812654	G	T	T	T	T	T
845464	A	G	G	G	G	G
849396	C	T	T	T	T	T
895071	T	C	C	C	C	C
1001553	A	G	G	G	G	G
1415496	C	T	T	T	T	T
1632528	A	T	T	T	T	T
1658492	C	N	A	A	A	A
1658495	C	N	T	T	T	T
1878019	G	T	T	T	T	T
2067338	G	A	N	A	A	A
2218046	G	T	T	T	T	T
2235109	T	C	C	C	N	N
2246134	G	N	N	T	N	N
2379235	C	N	A	A	A	A
2548551	G	T	T	T	T	T
2551201	A	C	N	C	N	C
2577686	A	G	G	G	G	G
2610671	G	A	A	A	A	A
2619611	T	N	G	G	G	G
2623991	G	A	A	A	A	A
2894703	T	N	C	C	C	C
3058666	G	A	A	A	A	A
3165712	C	T	T	T	N	T
3725545	T	C	C	C	C	C
3739401	C	N	A	A	N	A
4026673	T	C	C	C	C	C
4032953	C	T	T	T	T	T
4359384	C	T	T	T	T	T
4425403	C	T	T	T	T	T
4425405	C	T	T	T	T	T
4503392	T	C	C	C	N	C
4610707	G	N	T	T	N	T
4633707	T	C	C	C	N	C
