# Supplementary material for: Eighteenth century Yersinia pestis genomes reveal the long-term persistence of an historical plague focus
Source: eLife. 2016 Jan 21;5:e12994. doi: 10.7554/eLife.12994 (PMC4798955; doi:10.7554/eLife.12994)
Supplement: Supplementary file 2. — DOI: http://dx.doi.org/10.7554/eLife.12994.009 [file elife-12994-supp2.xls]

## Sheet: Sheet1
Table S2 – list of genomes used in SNP calling and phylogeny
Strain ID	SNP Calls	coverage(fold)	coverage(percent)	accession
0.ANT1a_42013	162	63.19	93.93	ADPG00000000 47685
0.ANT1b_CMCC49003	172	66.88	94.59	ADQX00000000 47685
0.ANT1c_945	185	50.49	92.05	ADPV00000000 47685
0.ANT1d_164	179	47.76	93.37	ADOW00000000 47685
0.ANT1e_CMCC8211	188	55.41	94.27	ADRD00000000 47685
0.ANT1f_42095	185	47.24	93.98	ADPJ00000000 47685
0.ANT1g_CMCC42007	185	53.09	93.43	ADQV00000000 47685
0.ANT1h_CMCC43032	182	38.54	93.05	ADQW00000000 47685
0.ANT2_B42003004	90	94.52	95.25	NZ_AAYU00000000
0.ANT2a_2330	90	66.53	92.44	ADOY00000000 47685
0.ANT3a_CMCC38001	93	67.2	93.74	ADQU00000000 47685
0.ANT3b_A1956001	91	66.62	93.98	ADPX00000000 47685
0.ANT3c_42082	92	27.29	92.06	ADPH00000000 47685
0.ANT3d_CMCC21106	99	42.78	91.74	ADQP00000000 47685
0.ANT3e_42091b	98	85.13	93.89	ADPI00000000 47685
0.PE2_PEST-F	507	92.06	93.07	NC_009381
0.PE2b_G8786	567	51.87	91.33	ADSG00000000 47685
0.PE3_Angola	889	89.73	91.04	NC_010159
0.PE4_Microtus91001	351	93.27	94.25	NC_005810
0.PE4Aa_12	267	49.15	92.27	ADOV00000000 47685
0.PE4Ab_9	264	46.84	93.04	ADPT00000000 47685
0.PE4Ba_PestoidesA	315	93.44	94.42	NZ_ACNT00000000
0.PE4Ca_CMCCN010025	325	61.42	92.9	ADRT00000000 47685
0.PE4Cb_M0000002	316	49.02	93.05	ADST00000000 47685
0.PE4Cc_CMCC18019	322	35.08	93.45	ADQO00000000 47685
0.PE4Cd_CMCC93014	331	52.98	94.06	ADRM00000000 47685
0.PE4Ce_CMCC91090	333	87.7	93.18	ADRJ00000000 47685
0.PE7b_620024	444	38.79	92.68	ADPM00000000 47685
1.ANT1_Antiqua	156	93.95	94.9	NC_008150
1.ANT1_UG05-0454	163	91.51	92.34	NZ_AAYR00000000
1.IN1a_CMCC11001	48	52.46	93.59	ADQK00000000 47685
1.IN1b_780441	51	54.96	94.66	ADPS00000000 47685
1.IN1c_K21985002	62	60.58	92.21	ADSS00000000 47685
1.IN2a_CMCC640047	43	45.14	92.33	ADRA00000000 47685
1.IN2b_30017	46	89.81	94.69	ADPC00000000 47685
1.IN2c_CMCC31004	46	56.78	92.84	ADQR00000000 47685
1.IN2d_C1975003	40	49.75	92.45	ADPZ00000000 47685
1.IN2e_C1989001	50	47.25	95.07	ADQB00000000 47685
1.IN2f_710317	49	42.58	94.17	ADPP00000000 47685
1.IN2g_CMCC05013	50	24.84	93.45	ADQF00000000 47685
1.IN2h_5	49	36.98	93.36	ADPK00000000 47685
1.IN2i_CMCC10012	53	59.62	93.98	ADQG00000000 47685
1.IN2j_CMCC27002	54	46.36	92.45	ADQQ00000000 47685
1.IN2k_970754	55	61.24	93.04	ADPW00000000 47685
1.IN2l_D1991004	52	38.21	94.56	ADRX00000000 47685
1.IN2m_D1964002b	53	76.63	94.7	ADRV00000000 47685
1.IN2n_CMCC02041	56	62.95	94.48	ADQC00000000 47685
1.IN2o_CMCC03001	54	41.46	92.42	ADQD00000000 47685
1.IN2p_D1982001	50	47.49	93.11	ADRW00000000 47685
1.IN2q_D1964001	52	33.69	92.63	ADRU00000000 47685
1.IN3a_F1954001	48	60.11	95.31	ADSC00000000 47685
1.IN3b_E1979001	44	40.72	94.92	NZ_AAYV00000000
1.IN3c_CMCC84038b	45	70.76	94.72	ADRF00000000 47685
1.IN3d_YN1683	46	32.63	93.19	ADTD00000000 47685
1.IN3e_YN472	44	57.37	95.34	ADTH00000000 47685
1.IN3f_YN1065	45	60.74	94.36	ADTC00000000 47685
1.IN3g_E1977001	45	50.42	93.47	ADRY00000000 47685
1.IN3h_CMCC84033	44	38.97	94	ADRE00000000 47685
1.IN3i_CMCC84046	48	66.26	95.35	ADRG00000000 47685
1.ORI1_CA88	13	94.97	95.69	NZ_ABCD00000000
1.ORI1_CO92	0	95.06	95.74	NC_003143
1.ORI1a_CMCC114001	26	44.58	92.37	ADQL00000000 47685
1.ORI1b_India195	28	92.74	93.47	NZ_ACNR00000000
1.ORI1c_F1946001	34	42.44	94.74	ADSB00000000 47685
1.ORI2_F1991016	40	94.5	95.2	NZ_ABAT00000000
1.ORI2a_YN2179	41	40.78	92.33	ADTE00000000 47685
1.ORI2c_YN2551b	42	44.84	94.5	ADTF00000000 47685
1.ORI2d_YN2588	40	48.06	91.99	ADTG00000000 47685
1.ORI2f_CMCC87001	38	59.25	94.71	ADRH00000000 47685
1.ORI2g_F1984001	40	42.89	92.63	ADSD00000000 47685
1.ORI2h_YN663	38	56.2	92.37	ADTI00000000 47685
1.ORI2i_CMCCK100001a	38	70.87	95.36	ADRR00000000 47685
1.ORI2i_CMCCK110001b	39	50.54	92.56	ADRS00000000 47685
1.ORI3_IP275	42	94.47	95.21	NZ_AAOS00000000
1.ORI3_MG05-1020	34	94.73	95.36	NZ_AAYS00000000
1.ORI3a_EV76	30	50.95	91.01	ADSA00000000 47685
2.ANT1_Nepal516	138	91.87	92.7	NZ_ACNQ00000000
2.ANT1a_34008	122	61.73	92.57	ADPD00000000 47685
2.ANT1b_34202	122	53.84	93.97	ADPE00000000 47685
2.ANT2a_2	117	52.78	93.05	ADOX00000000 47685
2.ANT2b_351001	121	40.92	92.98	ADPF00000000 47685
2.ANT2c_CMCC347001	119	32.57	93.87	ADQS00000000 47685
2.ANT2d_G1996006	117	56.48	94.12	ADSE00000000 47685
2.ANT2e_G1996010	121	68.03	94.21	ADSF00000000 47685
2.ANT2f_CMCC348002	120	57.17	94.3	ADQT00000000 47685
2.ANT3a_CMCC92010	128	60.52	91.48	ADRL00000000 47685
2.ANT3b_CMCC95001	126	49.74	92.38	ADRN00000000 47685
2.ANT3c_CMCC96001	127	74.21	94.22	ADRO00000000 47685
2.ANT3d_CMCC96007	129	69.28	92.53	ADRP00000000 47685
2.ANT3e_CMCC67001	137	62.64	91.29	ADRB00000000 47685
2.ANT3f_CMCC104003	126	71.42	93.99	ADQH00000000 47685
2.ANT3g_CMCC51020	127	50.32	93.12	ADQY00000000 47685
2.ANT3h_CMCC106002	126	68.1	93.94	ADQI00000000 47685
2.ANT3i_CMCC64001	133	56.49	91.43	ADQZ00000000 47685
2.ANT3j_H1959004	124	51.89	93.69	ADSI00000000 47685
2.ANT3k_5761	131	52.31	91.38	ADPL00000000 47685
2.ANT3l_735	135	49.37	92.53	ADPR00000000 47685
2.MED1b_2506	158	70.57	93.99	ADPA00000000 47685
2.MED1c_2654	157	29	93.57	ADPB00000000 47685
2.MED1d_2504	158	37.87	92.65	ADOZ00000000 47685
2.MED2_KIM10	171	93.81	94.65	NC_004088
2.MED2b_91	131	77.47	91.46	ADPU00000000 47685
2.MED2c_K11973002	129	59.49	93.09	NZ_AAYT00000000
2.MED2d_A1973001	129	31.97	91.78	ADPY00000000 47685
2.MED2e_7338	132	62.53	90.23	ADPQ00000000 47685
2.MED3a_J1963002	134	51.58	93.19	ADSP00000000 47685
2.MED3b_CMCC125002b	134	49.53	93.86	ADQN00000000 47685
2.MED3c_I1969003	133	73.87	93.97	ADSK00000000 47685
2.MED3d_J1978002	122	60.65	94.71	ADSQ00000000 47685
2.MED3f_I1970005	139	46.96	93.47	ADSL00000000 47685
2.MED3g_CMCC99103	136	41.71	93.66	ADRQ00000000 47685
2.MED3h_CMCC90027	136	50.58	91.2	ADRI00000000 47685
2.MED3i_CMCC92004	140	42.18	91.35	ADRK00000000 47685
2.MED3j_I2001001	137	78.49	94.82	ADSO00000000 47685
2.MED3k_CMCC12003	138	51.11	91.09	ADQM00000000 47685
2.MED3l_I1994006	141	62.9	93.9	ADSN00000000 47685
2.MED3m_SHAN11	142	51.92	92.72	ADTA00000000 47685
2.MED3n_SHAN12	142	42.92	93.19	ADTB00000000 47685
2.MED3o_I1991001	140	48.81	91.82	ADSM00000000 47685
2.MED3p_CMCC107004	141	100.25	94.78	ADQJ00000000 47685
3.ANT1a_7b	96	65.01	94.49	ADPN00000000 47685
3.ANT1b_CMCC71001	95	42	92.33	ADRC00000000 47685
3.ANT1c_C1976001	92	59.96	95.27	ADQA00000000 47685
3.ANT1d_71021	94	44.74	94.2	ADPO00000000 47685
3.ANT2a_MGJZ6	112	54.85	91.3	ADSX00000000 47685
3.ANT2b_MGJZ7	107	40.09	91.68	ADSY00000000 47685
3.ANT2c_MGJZ9	111	56.22	93.67	ADSZ00000000 47685
3.ANT2d_MGJZ11	113	53.19	94.25	ADSU00000000 47685
3.ANT2e_MGJZ3	111	63.11	93.09	ADSW00000000 47685
4.ANT1a_MGJZ12	94	55.06	93.32	ADSV00000000 47685
BD 6330	40	3.44	28.73	SRR341960
BD 8124_8291_11972	65	16.7	88.07	SRR341963, SRR341961, SRR341962
Justinian_A120	120	3.94	30.24	SRP033879
OBS107	136	12.2	84.79	This study
OBS110	145	14.61	90.63	This study
OBS116	154	20.04	92.56	This study
OBS124	133	13.34	85.37	This study
OBS137	157	24.4	92.76	This study
Y. pseudotuberculosis (outgroup)	12389	88.08	91.16	NC_006155
